# Supplementary material for: A consistent glacier inventory for Karakoram and Pamir derived from Landsat data: distribution of debris cover and mapping challenges
Source: Copernicus journal article supplement (doi:10.5194/essd-10-1807-2018), 2018-10-10

Supplement of Earth Syst. Sci. Data, 10, 1807–1827, 2018  
<https://doi.org/10.5194/essd-10-1807-2018-supplement>  
© Author(s) 2018. This work is distributed under  
the Creative Commons Attribution 4.0 License.

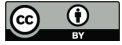

*Supplement of*

## **A consistent glacier inventory for Karakoram and Pamir derived from Landsat data: distribution of debris cover and mapping challenges**

**N. Mölg et al.**

*Correspondence to:* Nico Mölg ([nico.moelg@geo.uzh.ch](mailto:nico.moelg@geo.uzh.ch))

The copyright of individual parts of the supplement might differ from the CC BY 4.0 License.

**Supplement**

Fig. S1: Glacier slope vs. glacier size:

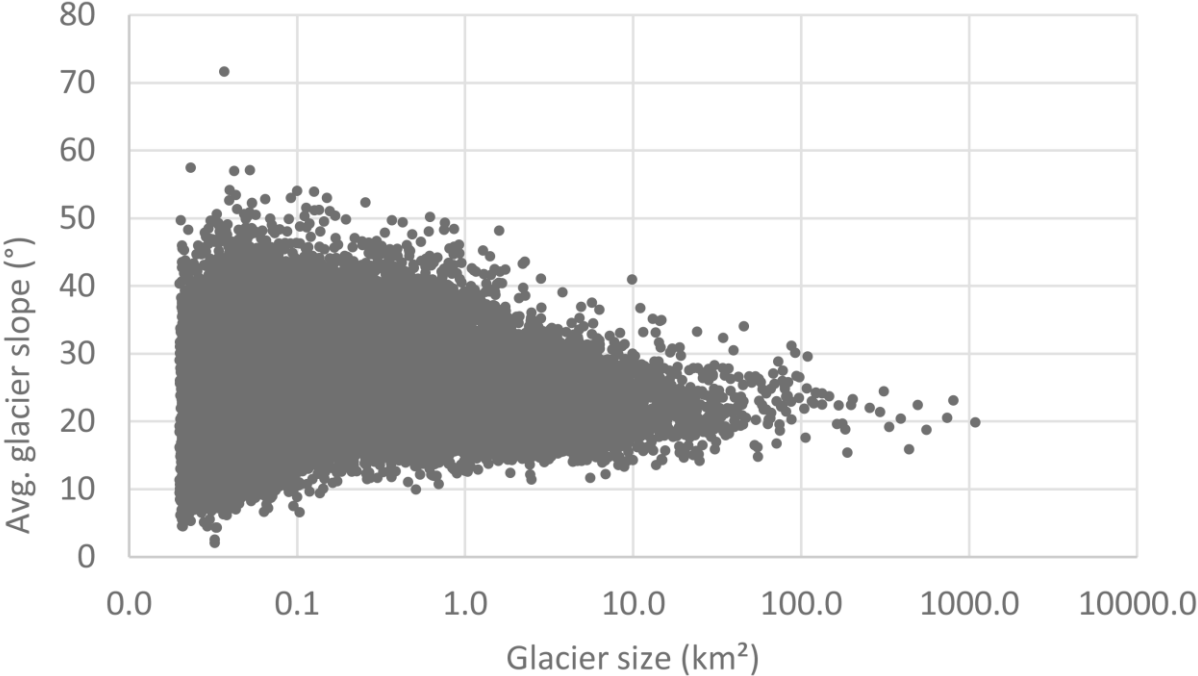

Fig. S2: Multiple digitising experiment example 'debris, shadow, rock glacier' :

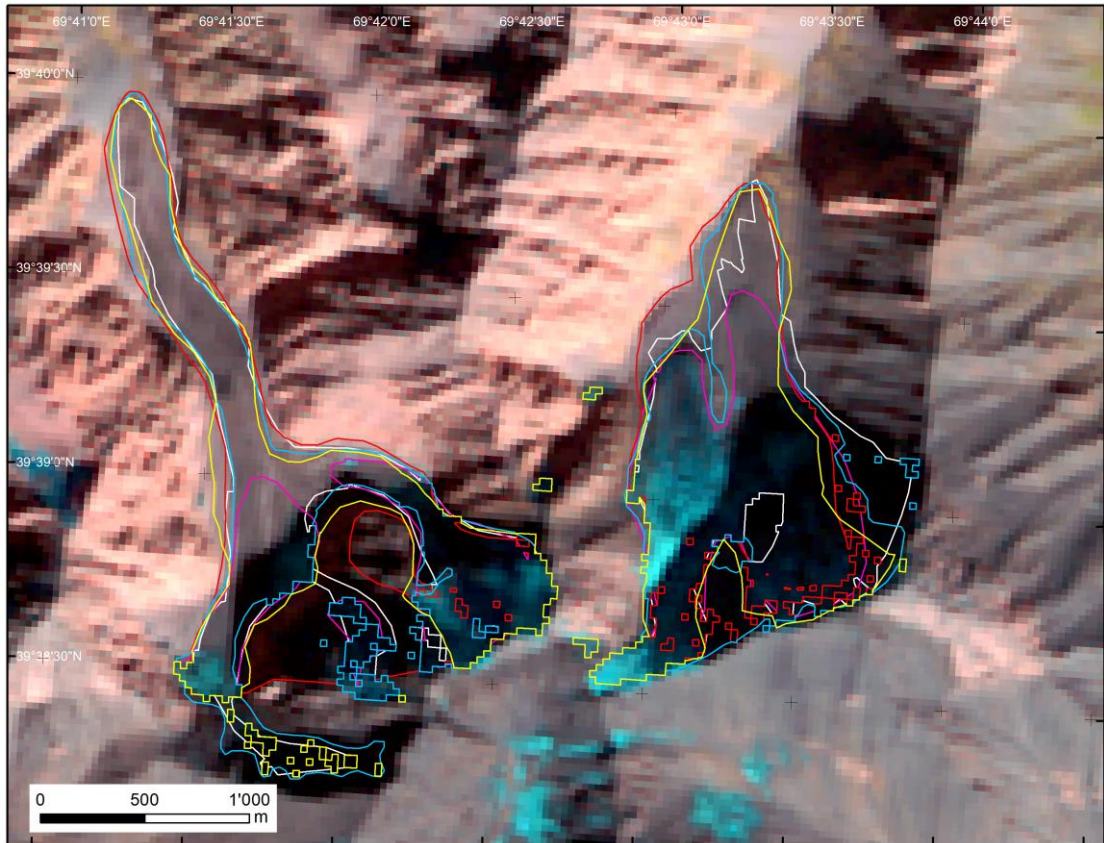

Supplement: Supplementary file 1 [file essd-10-1807-2018-supplement.pdf]
